# Supplementary material
Source: HighWire-hosted journal article supplement (http://www.jneurosci.org/highwire/filestream/601400/field_highwire_adjunct_files/0/Supplemental_Material.pdf)

**Supplementary Table 1: Maximal conductances  $\bar{g}$  (mS/cm<sup>2</sup>) and permeabilities (cm/s) of the currents included in the model.** Transient Na<sup>+</sup> current ( $I_{NaT}$ ), persistent Na<sup>+</sup> current ( $I_{NaP}$ ), intermediate Na<sup>+</sup> current ( $I_{NaT-In}$ ), delayed rectifier K<sup>+</sup> current ( $I_{KDR}$ ), slow K<sup>+</sup> current ( $I_{Kslow}$ ), A-type K<sup>+</sup> current ( $I_{KA}$ ), M-type K<sup>+</sup> current ( $I_{KM}$ ), Voltage- and Ca<sup>2+</sup>-dependent K<sup>+</sup> current ( $I_{KCT}$ ), Ca<sup>2+</sup>-dependent K<sup>+</sup> current ( $I_{KAHP}$ ), leak K<sup>+</sup> current ( $I_{Kleak}$ ), T-type Ca<sup>2+</sup> current ( $I_{CaT}$ ), L-type Ca<sup>2+</sup> current ( $I_{CaL}$ ), R-type Ca<sup>2+</sup> current ( $I_{CaR}$ ), N- and P/Q-type Ca<sup>2+</sup> current ( $I_{Canpq}$ ), hyperpolarization activated current ( $I_H$ ). Since the Ca<sup>2+</sup> currents were calculated according to the Goldman-Hodgkin-Katz equation the permeabilities are given instead of conductances. The conductance for  $I_{NaP}$  was systematically varied (see results). Some current densities at the dendrites were scaled linearly with the distance from soma (gradient, see Supplementary Table 2).

| Current      | Soma                  | Dendrites | Axon | Axon<br>hillock | AIS    |
|--------------|-----------------------|-----------|------|-----------------|--------|
| $I_{NaT}$    | 50                    | gradient  | 80   | 50              | 200    |
| $I_{NaP}$    | varied                | -         | -    | varied          | varied |
| $I_{NaT-In}$ | 0.5                   | -         | -    | 0.5             | 0.5    |
| $I_{KDR}$    | 5                     | 9         | 25   | 5               | 30     |
| $I_{Kslow}$  | 12                    | 2         |      | 12              | 8      |
| $I_{KA}$     | 11                    | gradient  | 20   | 11              | 20     |
| $I_{KM}$     | 3.2                   | -         | 5    | 3.2             | 4      |
| $I_{KCT}$    | 20                    | -         | -    | -               | -      |
| $I_{KAHP}$   | 0.4                   | -         | -    | -               | -      |
| $I_{Kleak}$  | 0.04                  | 0.04      | -    | -               | -      |
| $I_{CaT}$    | $1 \cdot 10^{-5}$     | gradient  | -    | -               | -      |
| $I_{CaL}$    | $6.622 \cdot 10^{-5}$ | -         | -    | -               | -      |
| $I_{CaR}$    | $4.4 \cdot 10^{-5}$   | -         | -    | -               | -      |
| $I_{Canpq}$  | $1.54 \cdot 10^{-5}$  | -         | -    | -               | -      |
| $I_H$        | 0.005                 | 0.01      | -    | -               | -      |

**Supplementary Table 2: Somatodendritic gradients of maximal conductances in apical and basal dendrites for  $I_{CaT}$ ,  $I_{KA}$  and  $I_{NaT}$ .** Conductances/permeabilities along the dendrites were calculated as  $f(x)=ax+b$  with  $x$  defined as distance from the soma normalized to the length of the dendrite ( $x=0$  to  $x=1$  from the nearest to the most distant point from the soma, respectively).

| Apical dendrites | a                   | b                 |
|------------------|---------------------|-------------------|
| $I_{CaT}$        | $3 \cdot 10^{-5}$   | $6 \cdot 10^{-6}$ |
| $I_{KA}$         | 30                  | 20                |
| $I_{NaT}$        | -5                  | 10                |
| Basal dendrites  |                     |                   |
| $I_{CaT}$        | $1.2 \cdot 10^{-5}$ | $6 \cdot 10^{-6}$ |
| $I_{KA}$         | 20                  | 20                |
| $I_{NaT}$        | -5                  | 10                |

**Supplementary Table 3: Parameters of single action potentials in *Scn1b* and *Scn2b* null mice and their littermate controls.**

|                             |                | <i>Scn1b</i> |           | <i>Scn2b</i> |           |
|-----------------------------|----------------|--------------|-----------|--------------|-----------|
|                             |                | +/+          | -/-       | +/+          | -/-       |
| Action potential morphology | Peak (mV)      | 29±2.0       | 17±3.6    | 19±2.0       | 19±2.9    |
|                             | Slope (mV/ms)  | 514±48       | 406±62    | 374±7        | 357±62    |
|                             | Threshold (mV) | -54±2.8      | -56±3.1   | -53±3.1      | -51±4.4   |
|                             | Halfwidth (ms) | 0.68±0.05    | 0.86±0.06 | 0.72±0.04    | 0.71±0.02 |

**Supplementary Figure 1:** Acceleration of inactivation with CBZ. Time course of decay was quantified with monoexponential fitting at various command potentials for *Scn1b* and *Scn2b* null mice (panel A<sub>3</sub>, A<sub>4</sub>) and their littermate controls (panels A<sub>1</sub>, A<sub>2</sub>). Significant differences are indicated by asterisks.

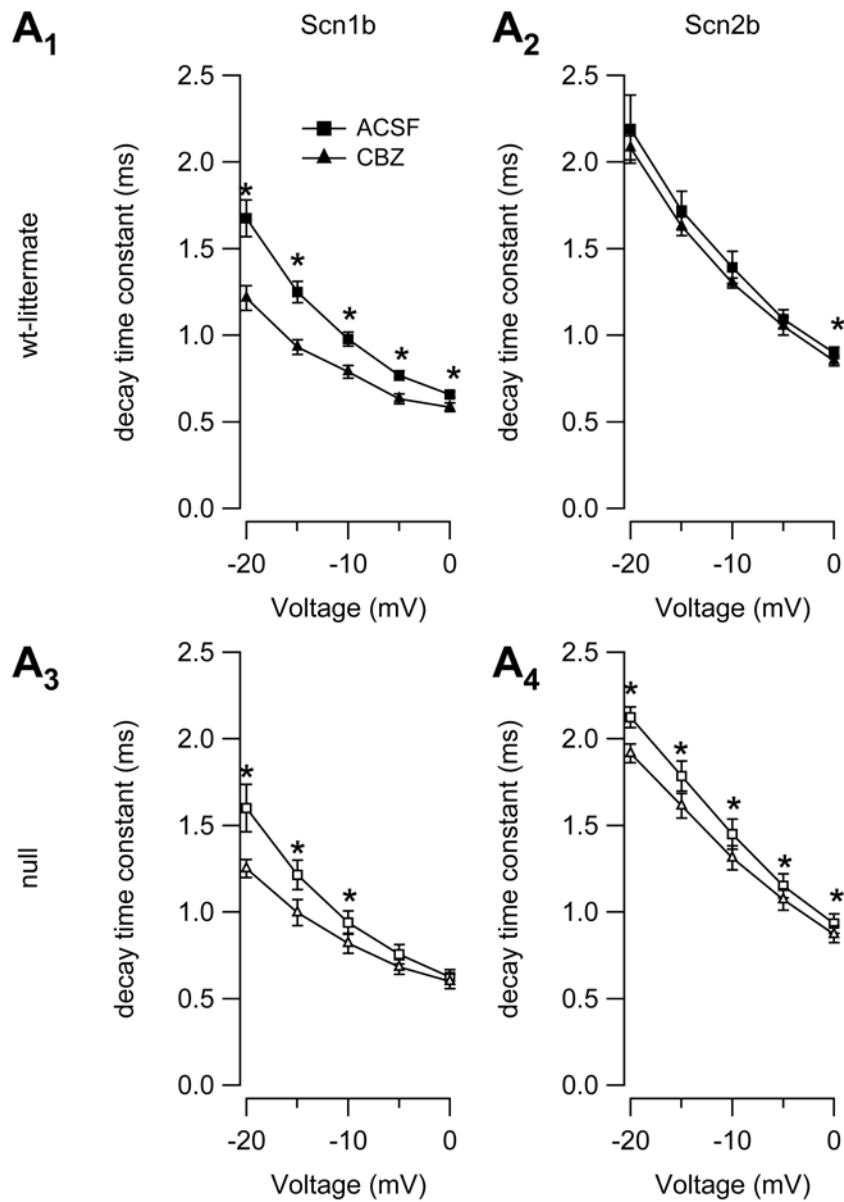

Supplement: Supplemental_Material.pdf [file Supplemental_Material.pdf]
